# Supplementary material for: An electrocatalytic route for transformation of biomass-derived furfural into 5-hydroxy-2(5H)-furanone
Source: Royal Society of Chemistry journal article supplement (doi:10.1039/c9sc00322c), 2019-01-01
Supplement: c9sc00322c1.pdf [file c9sc00322c1.pdf]

## Electrocatalytic route for transformation of biomass-derived furfural to 5-hydroxy-2(5H)-furanone

Haoran Wu,<sup>a,b</sup> Jinliang Song,<sup>\*a</sup> Huizhen Liu,<sup>a,b</sup> Zhenbing Xie,<sup>a,b</sup> Chao Xie,<sup>a,b</sup> Yue Hu,<sup>a,b</sup> Xin Huang,<sup>a,b</sup> Manli Hua,<sup>a,b</sup> and Buxing Han<sup>\*a,b</sup>

<sup>a</sup>Beijing National Laboratory for Molecular Science, CAS Key Laboratory of Colloid and Interface and Thermodynamics, CAS Research/Education Center for Excellence in Molecular Sciences, Institute of Chemistry, Chinese Academy of Sciences, Beijing 100190, China.

<sup>b</sup>School of Chemistry and Chemical Engineering, University of Chinese Academy of Sciences, Beijing 100049, China.

E-mails: songjl@iccas.ac.cn; hanbx@iccas.ac.cn.

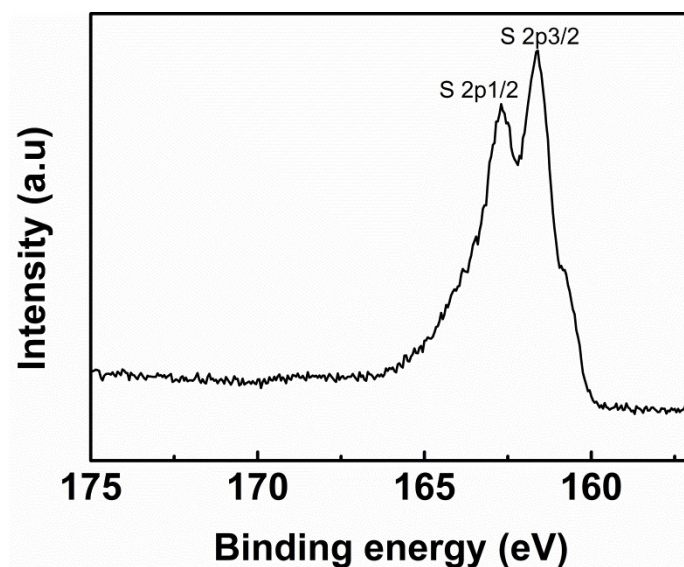

Fig. S1. XPS of S 2p in the prepared CuS.

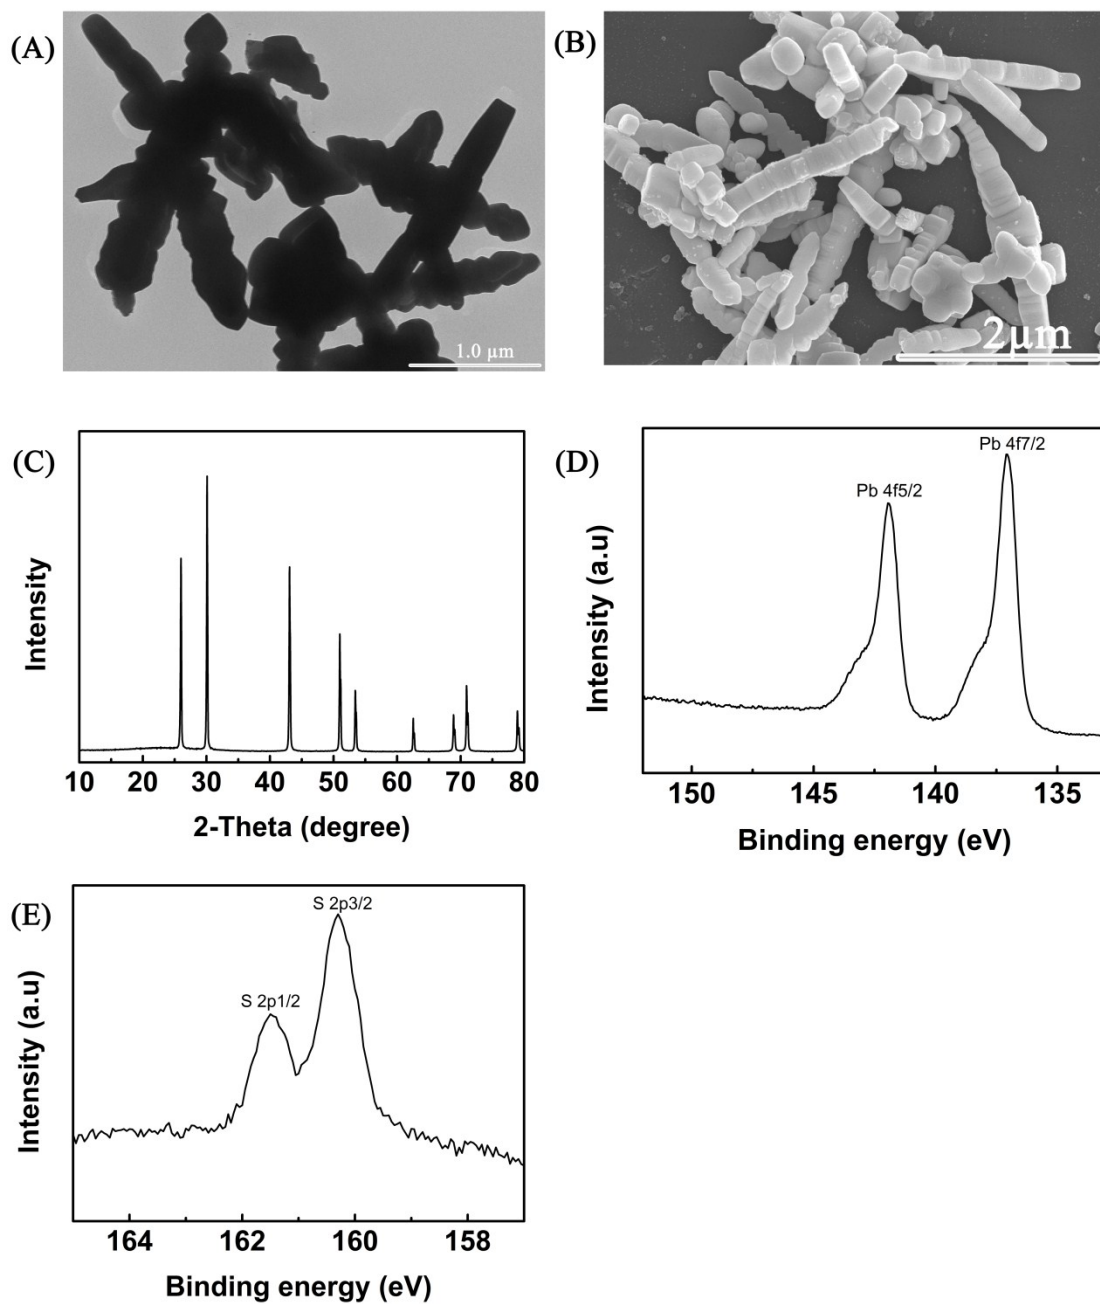

**Fig. S2.** Characterization of the prepared PbS. TEM image (A), SEM image (B), XRD (C), XPS of Pb 4f (D), and S 2p (E).

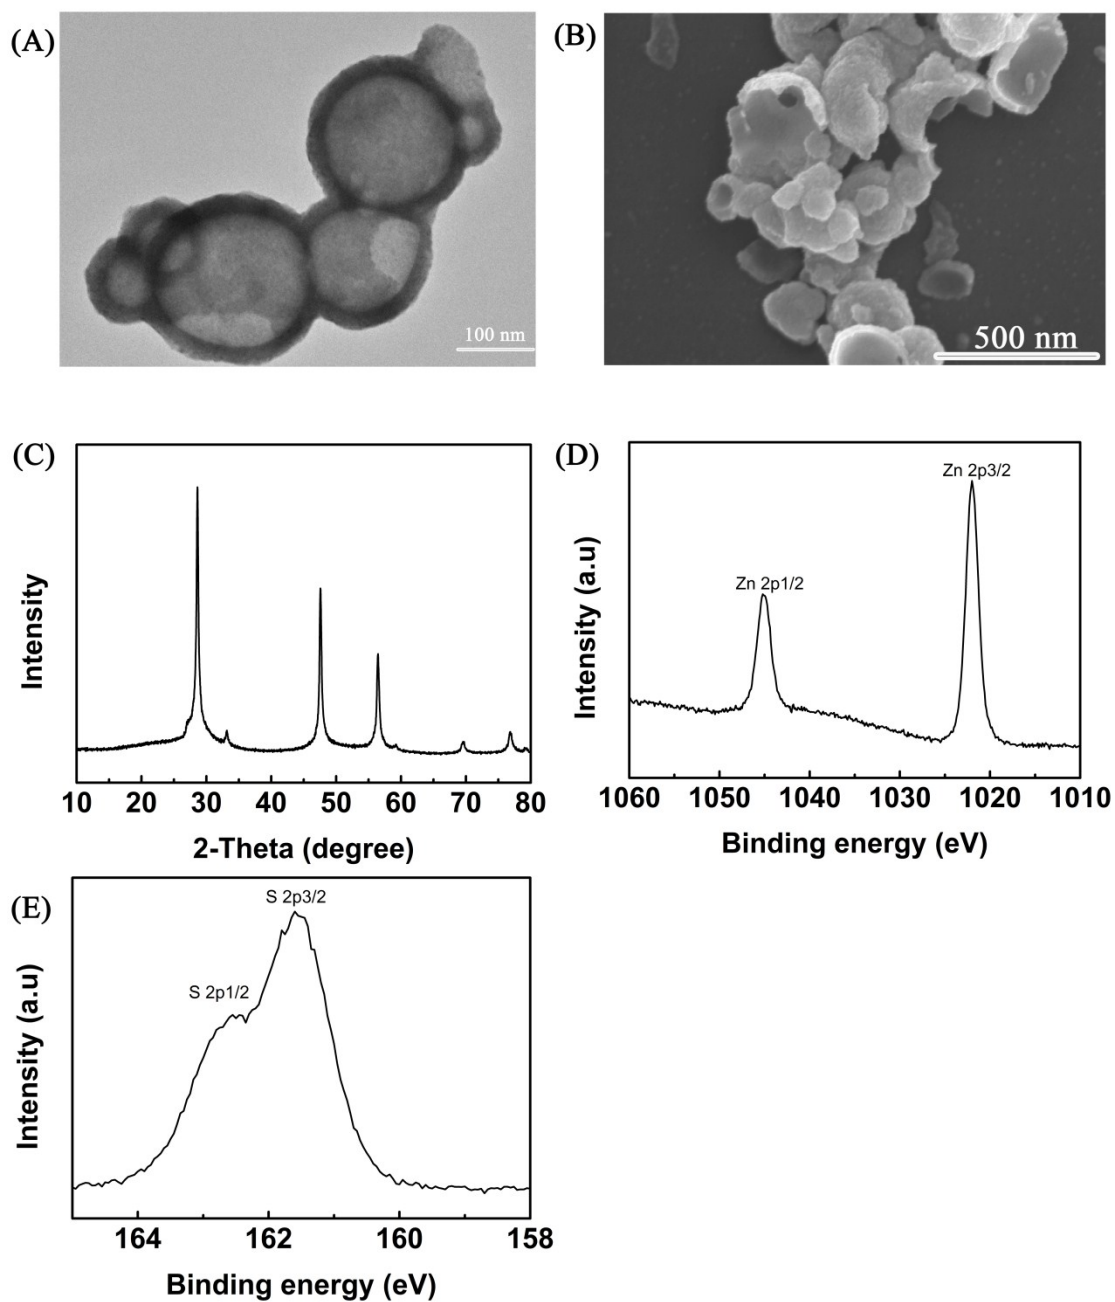

**Fig. S3.** Characterization of the prepared ZnS. TEM image (A), SEM image (B), XRD (C), XPS of Zn 2p (D), and S 2p (E).

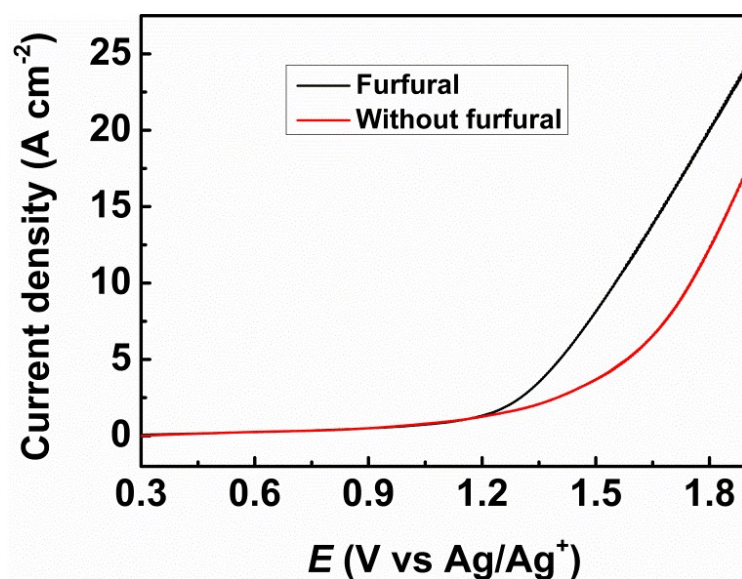

**Fig. S4.** LSV measurements using the prepared PbS/CP electrode for the electrochemical oxidation of furfural in the electrolyte of  $[\text{Et}_3\text{NH}]\text{NO}_3$  (1.8 wt%)-MeCN- $\text{H}_2\text{O}$  (12.5 wt%).

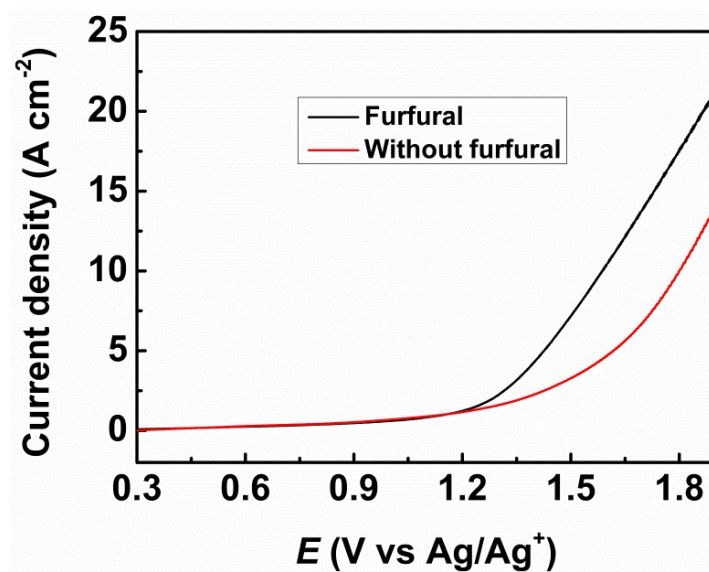

**Fig. S5.** LSV measurements using the prepared ZnS/CP electrode for the electrochemical oxidation of furfural in the electrolyte of  $[\text{Et}_3\text{NH}]\text{NO}_3$  (1.8 wt%)-MeCN- $\text{H}_2\text{O}$  (12.5 wt%).

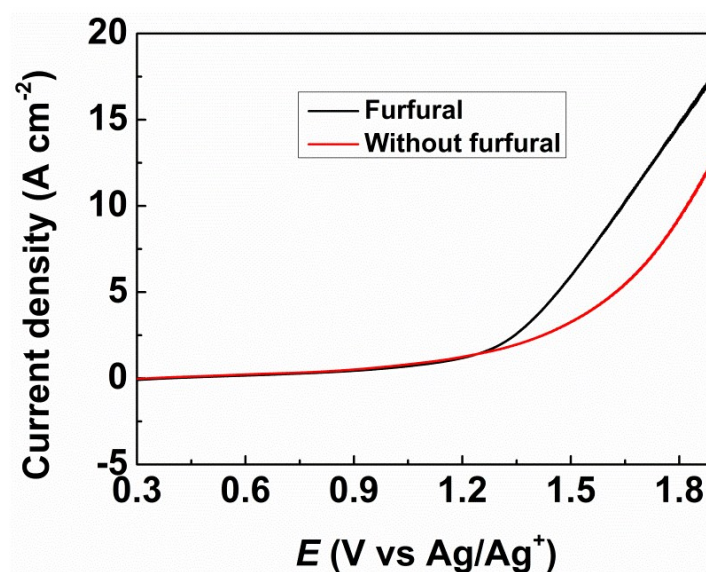

**Fig. S6.** LSV measurements using the prepared WS<sub>2</sub>/CP electrode for the electrochemical oxidation of furfural in the electrolyte of [Et<sub>3</sub>NH]NO<sub>3</sub> (1.8 wt%)-MeCN-H<sub>2</sub>O (12.5 wt%).

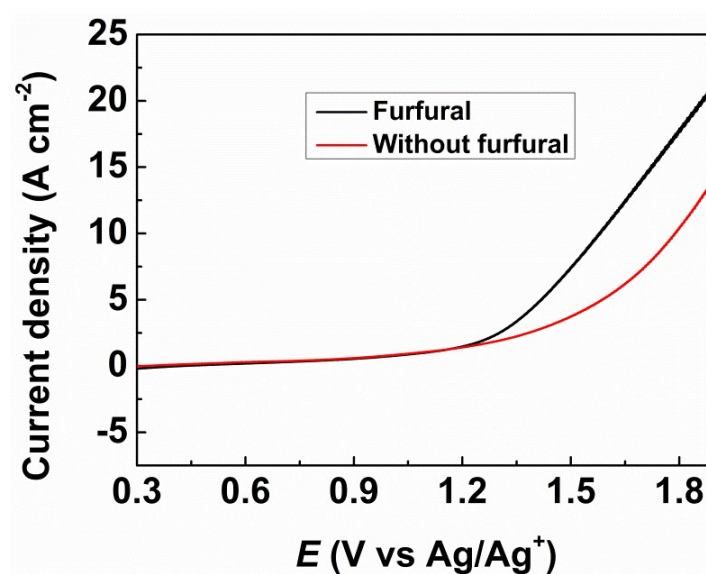

**Fig. S7.** LSV measurements using the prepared MoS<sub>2</sub>/CP electrode for the electrochemical oxidation of furfural in the electrolyte of [Et<sub>3</sub>NH]NO<sub>3</sub> (1.8 wt%)-MeCN-H<sub>2</sub>O (12.5 wt%).



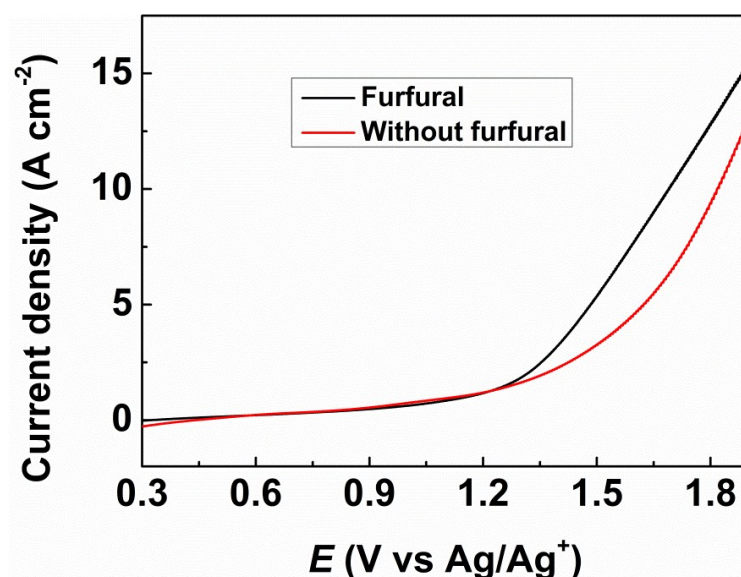

**Fig. S8.** LSV measurements using the prepared CdS/CP electrode for the electrochemical oxidation of furfural in the electrolyte of [Et<sub>3</sub>NH]NO<sub>3</sub> (1.8 wt%)-MeCN-H<sub>2</sub>O (12.5 wt%).

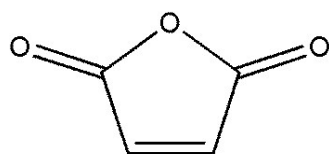

**Maleic anhydride**

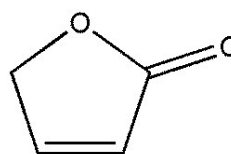

**2(5H)-furanone**

**Scheme S1.** The structures of maleic anhydride and 2(5H)-furanone.

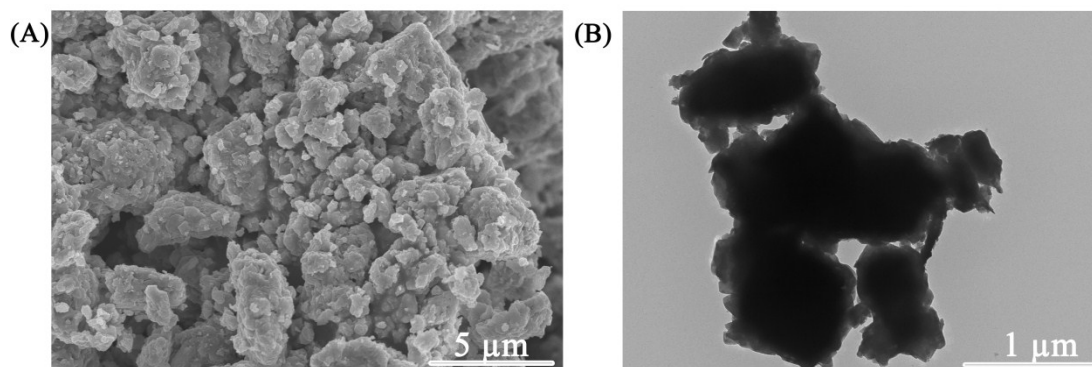

**Fig. S9.** Characterization of commercial CuS. SEM (A) and TEM (B) images.

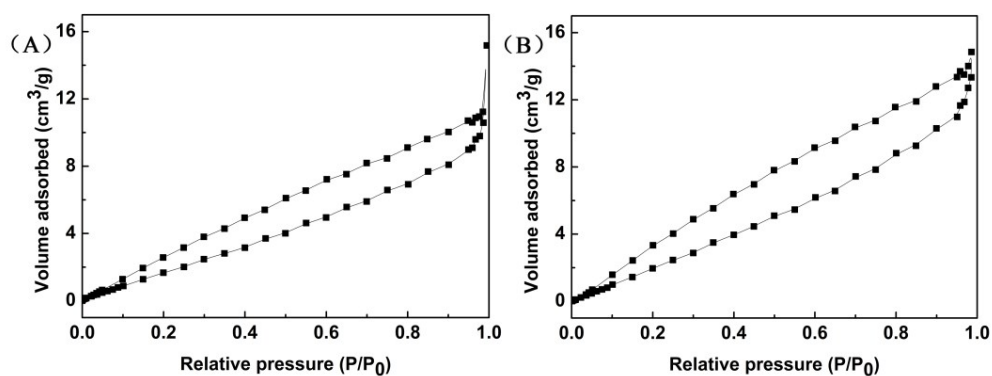

**Fig. S10.** N<sub>2</sub> adsorption-desorption isotherm of the commercial CuS (A) and prepared CuS (B)

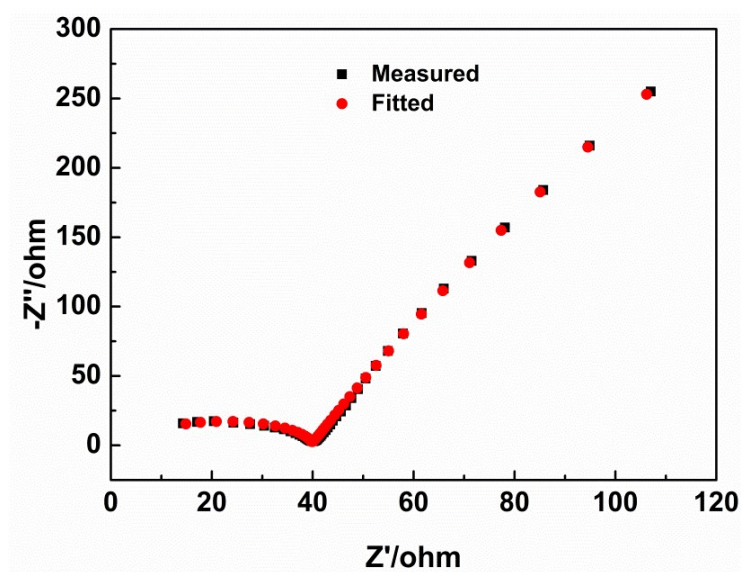

**Fig. S11.** The measured and fitted EIS spectra of CuS/CP in [Et<sub>3</sub>NH]NO<sub>3</sub> (1.8 wt%)-MeCN-H<sub>2</sub>O (12.5 wt%) electrolyte in the presence of furfural.

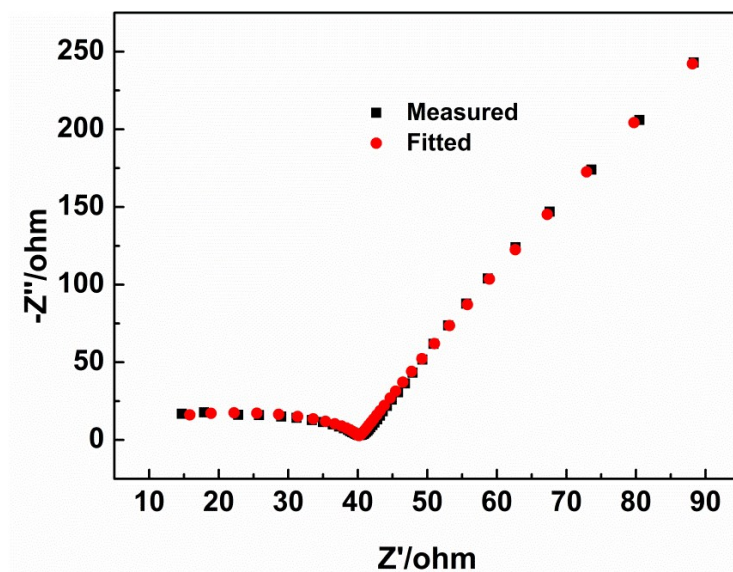

**Fig. S12.** The measured and fitted EIS spectra of PbS/CP in  $[\text{Et}_3\text{NH}]\text{NO}_3$  (1.8 wt%)-MeCN- $\text{H}_2\text{O}$  (12.5 wt%) electrolyte in the presence of furfural.

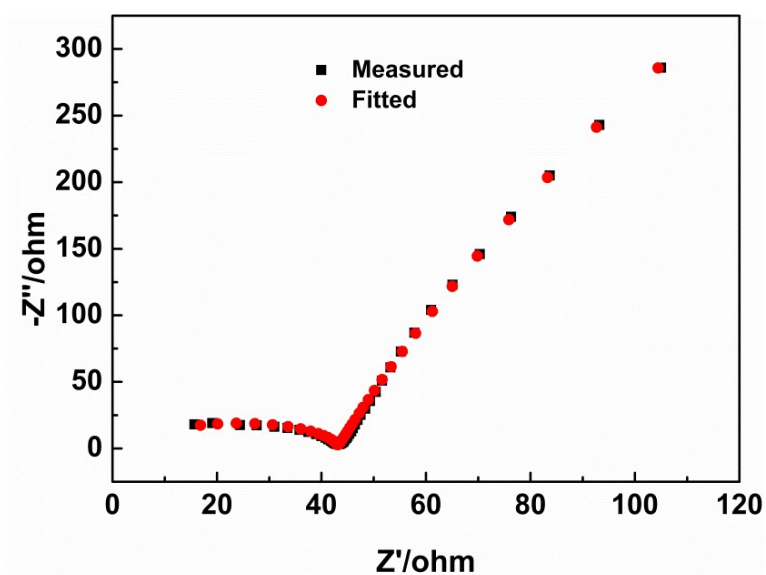

**Fig. S13.** The measured and fitted EIS spectra of ZnS/CP in  $[\text{Et}_3\text{NH}]\text{NO}_3$  (1.8 wt%)-MeCN- $\text{H}_2\text{O}$  (12.5 wt%) electrolyte in the presence of furfural.



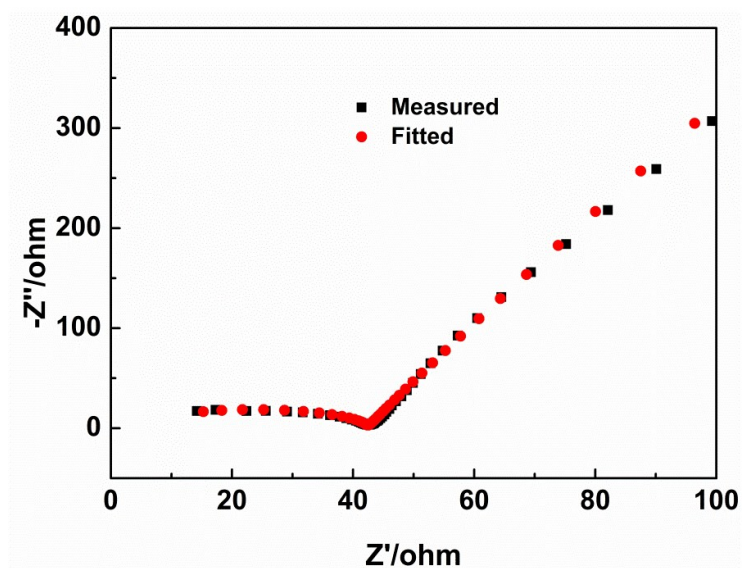

**Fig. S14.** The measured and fitted EIS spectra of CuO/CP in  $[\text{Et}_3\text{NH}]\text{NO}_3$  (1.8 wt%)-MeCN- $\text{H}_2\text{O}$  (12.5 wt%) electrolyte in the presence of furfural.

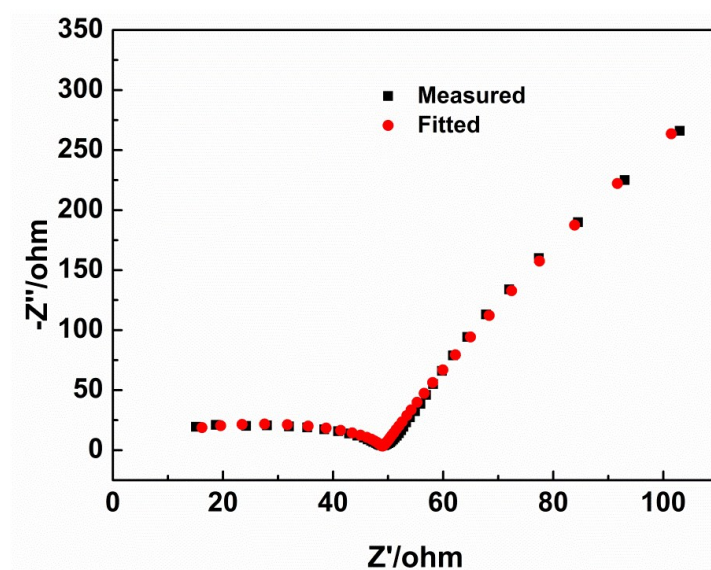

**Fig. S15.** The measured and fitted EIS spectra of CdS/CP in  $[\text{Et}_3\text{NH}]\text{NO}_3$  (1.8 wt%)-MeCN- $\text{H}_2\text{O}$  (12.5 wt%) electrolyte in the presence of furfural.

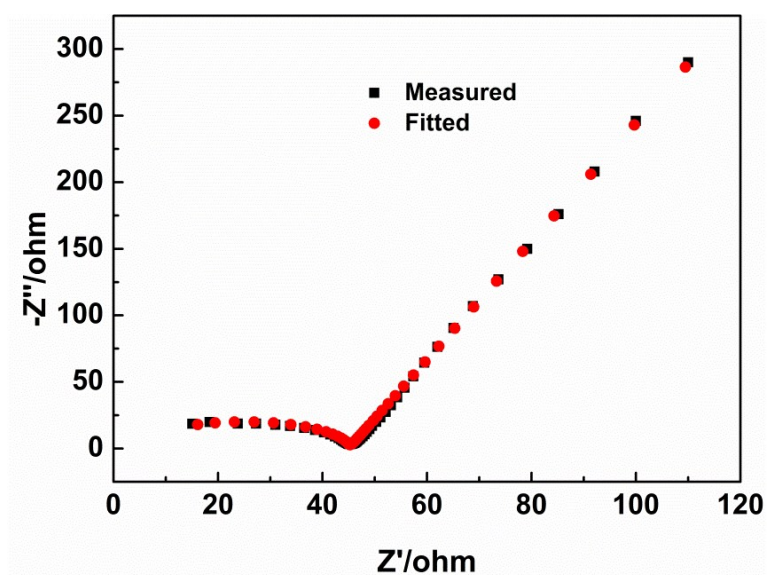

**Fig. S16.** The measured and fitted EIS spectra of MoS<sub>2</sub>/CP in [Et<sub>3</sub>NH]NO<sub>3</sub> (1.8 wt%)-MeCN-H<sub>2</sub>O (12.5 wt%) electrolyte in the presence of furfural.

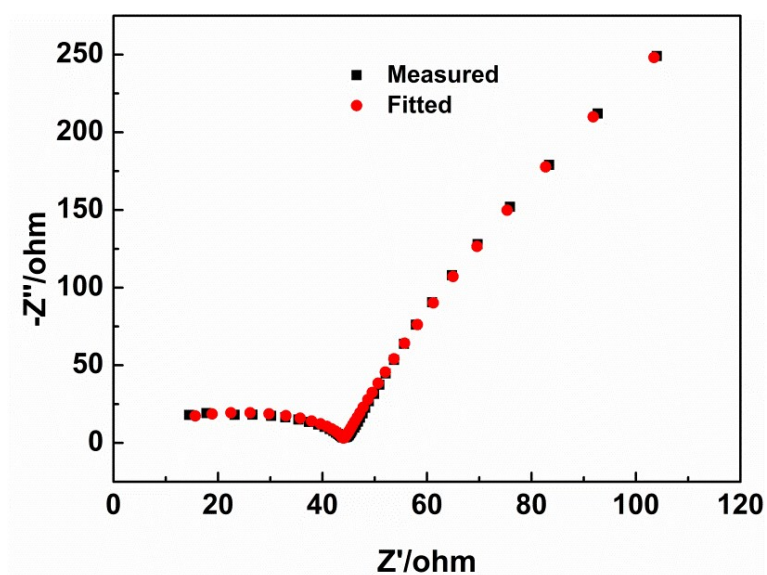

**Fig. S17.** The measured and fitted EIS spectra of WS<sub>2</sub>/CP in [Et<sub>3</sub>NH]NO<sub>3</sub> (1.8 wt%)-MeCN-H<sub>2</sub>O (12.5 wt%) electrolyte in the presence of furfural.

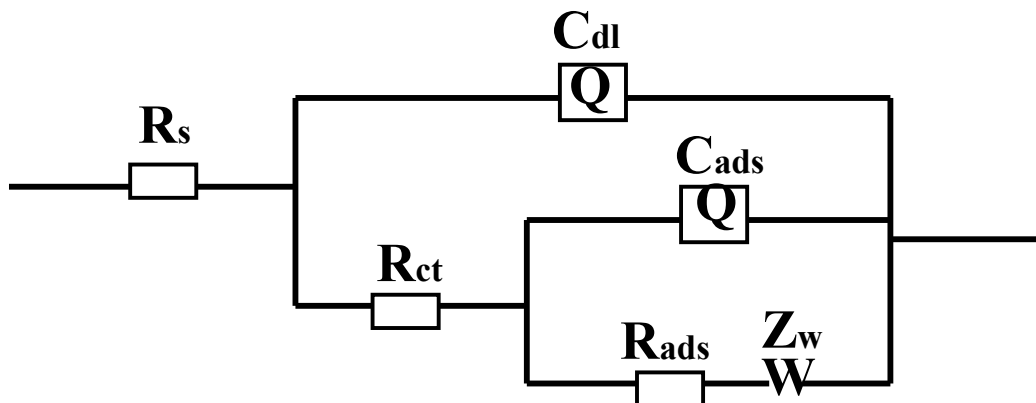

**Fig. S18.** Electrical equivalent circuit for fitting the measured impedance data.  $R_s$ ,  $R_{ct}$ ,  $C_{dl}$ ,  $C_{ads}$ ,  $Z_w$ , and  $R_{ads}$  represent solution resistance, electron transfer resistance, double layer capacitance, surface adsorption capacitance, Warburg impedance, and surface adsorption resistance, respectively.

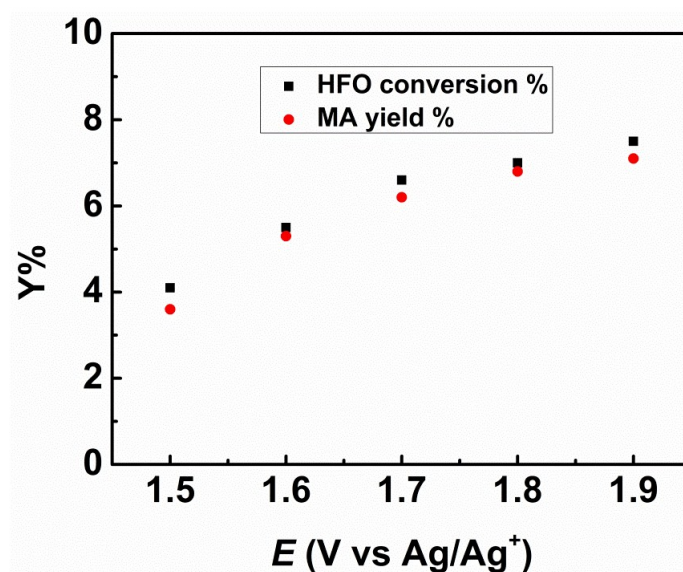

**Fig. S19.** Effect of applied potential on the electrochemical oxidation of HFO over CuS/CP electrode in the electrolyte (5.6 g) of  $[Et_3NH]NO_3$  (1.8 wt%)-MeCN- $H_2O$  (12.5 wt%) with 1 mmol of HFO for 7 h.

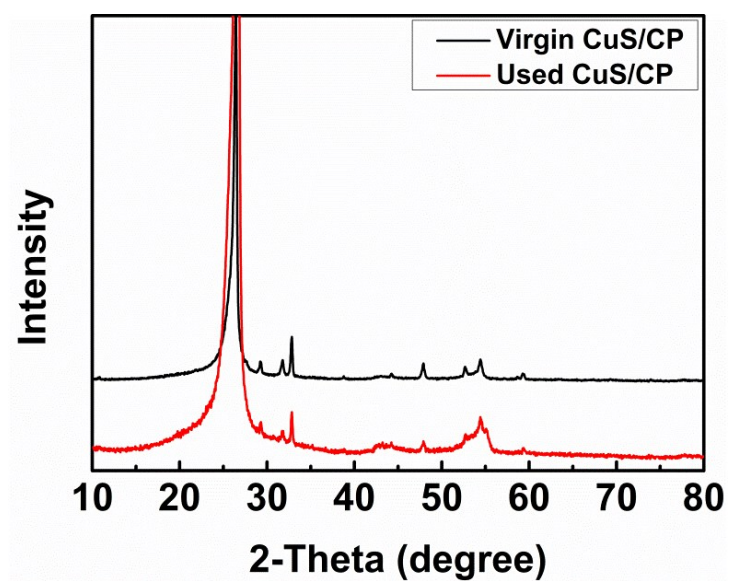

**Fig. S20.** XRD patterns of the virgin and used CuS/CP (24 h) electrode.

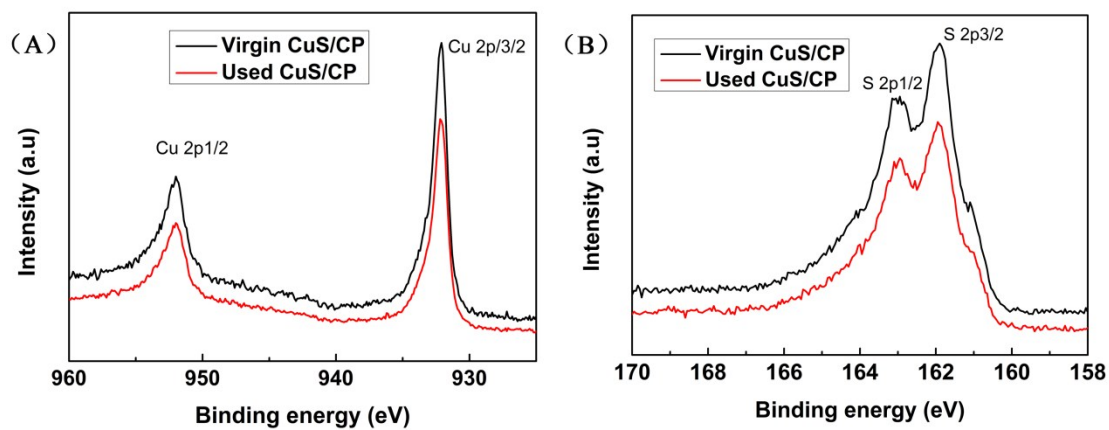

**Fig. S21.** XPS of the virgin and used CuS/CP (24 h) electrode.

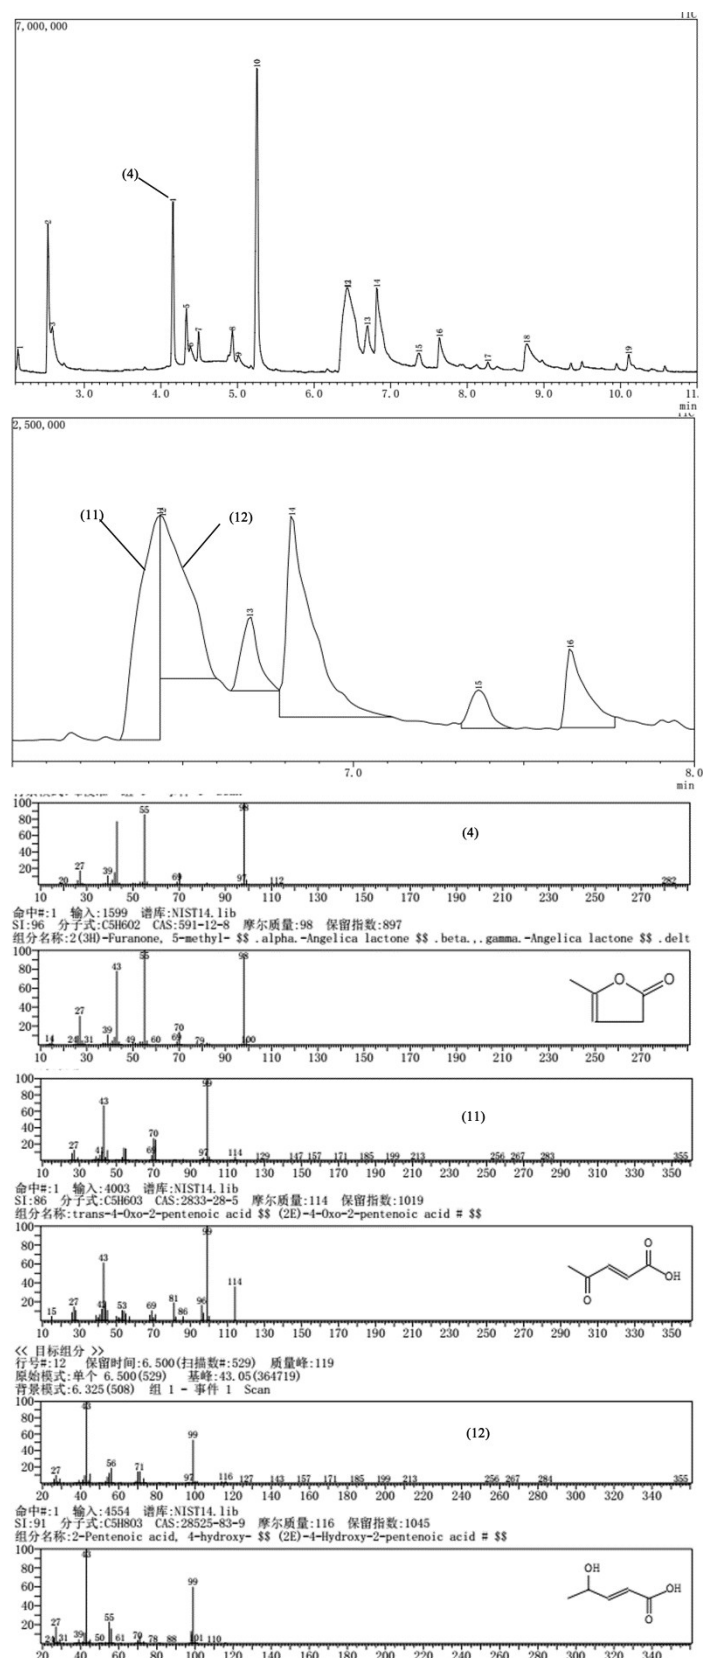

**Fig. S22.** GC-MS spectra of electrolyte after electrolysis for the electrochemical oxidation of 5-methylfurfural using CuS/CP in [Et<sub>3</sub>NH]NO<sub>3</sub> (1.8 wt%)-MeCN-H<sub>2</sub>O (12.5 wt%) at 1.6 V vs. Ag/Ag<sup>+</sup>.



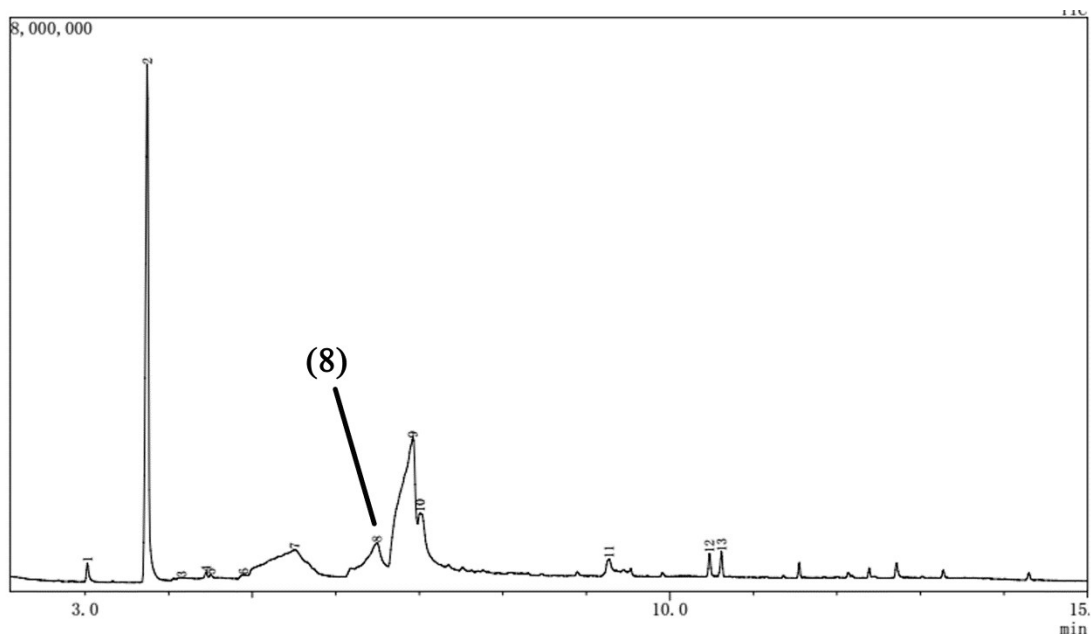

<< 目标组分 >>  
 行号#:8 保留时间:6.492(扫描数#:528) 质量峰:98  
 原始模式:平均 6.483-6.500(527-529) 基峰:100.05(44936)  
 背景模式:峰校准 组 1 - 事件 1 Scan

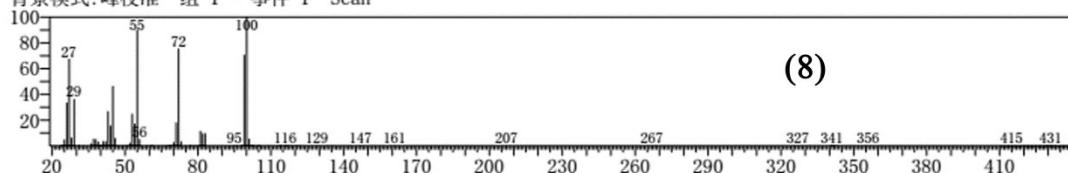

命中#:1 输入:1902 谱库:NIST14.lib  
 SI:86 分子式:C4H4O3 CAS:22418-77-5 摩尔质量:100 保留指数:972  
 组分名称:2-Butenoic acid, 4-oxo- (2E)-4-Oxo-2-butenoic acid #

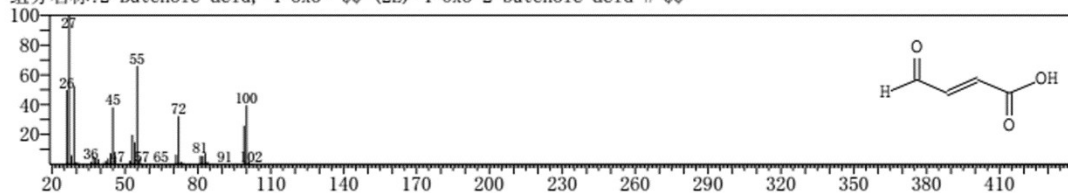

**Fig. S23.** GC-MS spectra of electrolyte after electrolysis for the electrochemical oxidation of furfural using CuS/CP in  $[\text{Et}_3\text{NH}]\text{NO}_3$  (1.8 wt%)-MeCN- $\text{H}_2\text{O}$  (12.5 wt%) at 1.6 V vs.  $\text{Ag}/\text{Ag}^+$ .

**Table S1** Parameter values of the equivalent circuit model.

| Entry | Electrode            | $R_s$ ( $\Omega$ cm <sup>-2</sup> ) | $R_c$ ( $\Omega$ cm <sup>-2</sup> ) | Cdl ( $\times 10^{-2}$ $\mu$ F cm <sup>-2</sup> ) |
|-------|----------------------|-------------------------------------|-------------------------------------|---------------------------------------------------|
| 1     | PbS/CP               | 5.045                               | 35.02                               | 6.796                                             |
| 2     | ZnS/CP               | 5.174                               | 37.86                               | 6.294                                             |
| 3     | CdS/CP               | 5.344                               | 43.54                               | 6.346                                             |
| 4     | MoS <sub>2</sub> /CP | 4.993                               | 40.80                               | 6.396                                             |
| 5     | WS <sub>2</sub> /CP  | 4.938                               | 39.01                               | 6.624                                             |
| 6     | CuS/CP               | 5.240                               | 34.51                               | 7.405                                             |
| 7     | CuO/CP               | 5.215                               | 37.17                               | 7.022                                             |

**Table S2.** The conductivity of [Et<sub>3</sub>NH]NO<sub>3</sub>-CH<sub>3</sub>CN- H<sub>2</sub>O (12.5 wt%) electrolyte.

| Entry | [Et <sub>3</sub> NH]NO <sub>3</sub> (wt%) | Conductivity (ms cm <sup>-1</sup> ) |
|-------|-------------------------------------------|-------------------------------------|
| 1     | 0.9                                       | 4.28                                |
| 2     | 1.8                                       | 6.81                                |
| 3     | 3.6                                       | 10.84                               |
| 4     | 5.4                                       | 14.69                               |
| 5     | 7.1                                       | 18.13                               |
| 6     | 8.9                                       | 20.50                               |
